# Supplementary material for: High-Throughput Phenotyping to Detect Drought Tolerance QTL in Wild Barley Introgression Lines
Source: PLoS One. 2014 May 13;9(5):e97047. doi: 10.1371/journal.pone.0097047 (PMC4019662; doi:10.1371/journal.pone.0097047)
Supplement: Table S7 — ANOVA (Model II SSI) results of studied traits. (XLSX) [file pone.0097047.s008.xlsx]

## Sheet: ANOVA SSI TS7
Table S7: ANOVA (Model II SSI) results of studied traits
AGRI	Effect	Numerator DF	Denominator DF	F-Statistics	Pr > F
	Line	49	196	0.62	0.9766
	Experiment	1	4	30.52	0.0052
	Line*Experiment	49	196	0.81	0.8128
BMD	Effect	Numerator DF	Denominator DF	F-Statistics	Pr > F
	Line	49	196	0.91	0.6442
	Experiment	1	4	2.02	0.2285
	Line*Experiment	49	196	0.92	0.6305
CALI	Effect	Numerator DF	Denominator DF	F-Statistics	Pr > F
	Line	49	198	1.09	0.3353
	Experiment	1	198	19.12	<.0001
	Line*Experiment	49	198	1	0.4745
COMI	Effect	Numerator DF	Denominator DF	F-Statistics	Pr > F
	Line	49	198	1.23	0.1669
	Experiment	1	198	49.28	<.0001
	Line*Experiment	49	198	1.38	0.0655
HEI	Effect	Numerator DF	Denominator DF	F-Statistics	Pr > F
	Line	49	196	0.78	0.8526
	Experiment	1	4	38.56	0.0034
	Line*Experiment	49	196	0.94	0.5841
HEII	Effect	Numerator DF	Denominator DF	F-Statistics	Pr > F
	Line	49	198	0.96	0.5599
	Experiment	1	198	0.29	0.5879
	Line*Experiment	49	198	0.87	0.7059
HUEI	Effect	Numerator DF	Denominator DF	F-Statistics	Pr > F
	Line	49	198	0.83	0.7756
	Experiment	1	198	15.67	0.0001
	Line*Experiment	49	198	0.61	0.9773
HULI	Effect	Numerator DF	Denominator DF	F-Statistics	Pr > F
	Line	49	198	0.6	0.9829
	Experiment	1	198	30.19	<.0001
	Line*Experiment	49	198	1.03	0.4267
RGRI	Effect	Numerator DF	Denominator DF	F-Statistics	Pr > F
	Line	49	196	0.85	0.7437
	Experiment	1	4	51.87	0.002
	Line*Experiment	49	196	1.25	0.1487
SAI	Effect	Numerator DF	Denominator DF	F-Statistics	Pr > F
	Line	49	196	0.66	0.955
	Experiment	1	4	9.49	0.0369
	Line*Experiment	49	196	0.77	0.8611
SATVI	Effect	Numerator DF	Denominator DF	F-Statistics	Pr > F
	Line	49	198	0.66	0.9575
	Experiment	1	198	8.26	0.0045
	Line*Experiment	49	198	0.88	0.6958
SPW	Effect	Numerator DF	Denominator DF	F-Statistics	Pr > F
	Line	49	195	1.08	0.3566
	Experiment	1	4	11.05	0.0293
	Line*Experiment	49	195	0.75	0.8786
TIL	Effect	Numerator DF	Denominator DF	F-Statistics	Pr > F
	Line	49	196	0.7	0.9259
	Experiment	1	4	15.48	0.017
	Line*Experiment	49	196	0.83	0.7836
WUE	Effect	Numerator DF	Denominator DF	F-Statistics	Pr > F
	Line	49	195	0.71	0.9227
	Experiment	1	4	6.06	0.0696
	Line*Experiment	49	195	0.81	0.8104
